# Supplementary material for: Optimization of Fe/Ni organic frameworks with core–shell structures for efficient visible-light-driven reduction of carbon dioxide to carbon monoxide
Source: Royal Society of Chemistry journal article supplement (doi:10.1039/d2nr04377g), 2022-01-01
Supplement: d2nr04377g1.pdf [file d2nr04377g1.pdf]

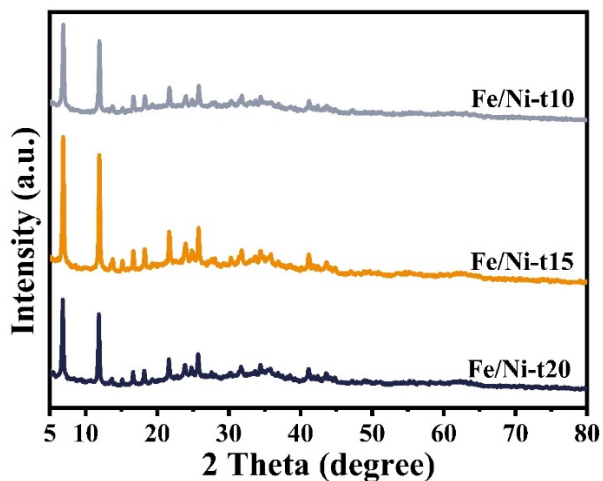

Figure 1s. XRD of Fe/Ni-t10, Fe/Ni-t15(Fe/Ni-T120), Fe/Ni-t20.

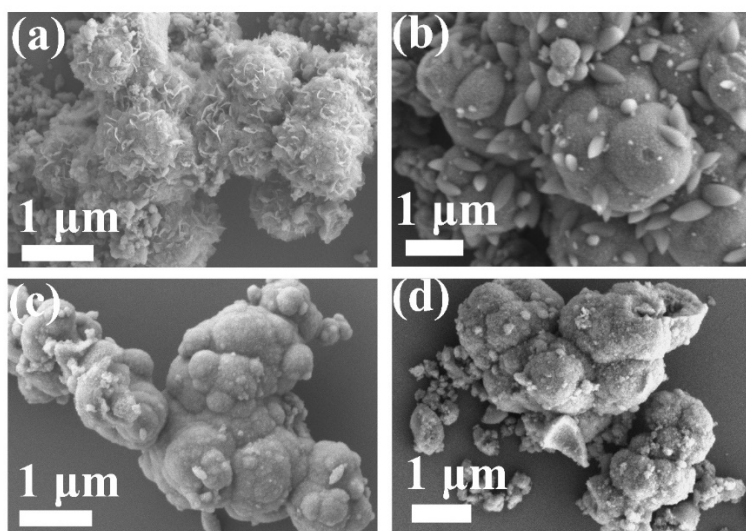

Figure 2s.(a) SEM images of Fe/Ni-t10, (b) Fe/Ni-t15(Fe/Ni-T120), (c)Fe/Ni-t20, (d)  
Photocatalytic Fe/Ni- t15(Fe/Ni-T120).

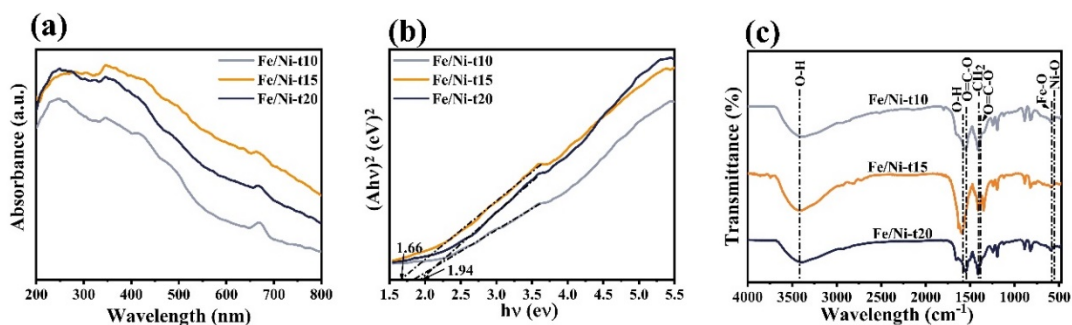

Figure 3s. (a) UV-vis DRS spectra, (b) Tauc plots, (c) FT-IR spectra of Fe/Ni-t10,  
Fe/Ni-t15(Fe/Ni-T120) and Fe/Ni-t20.

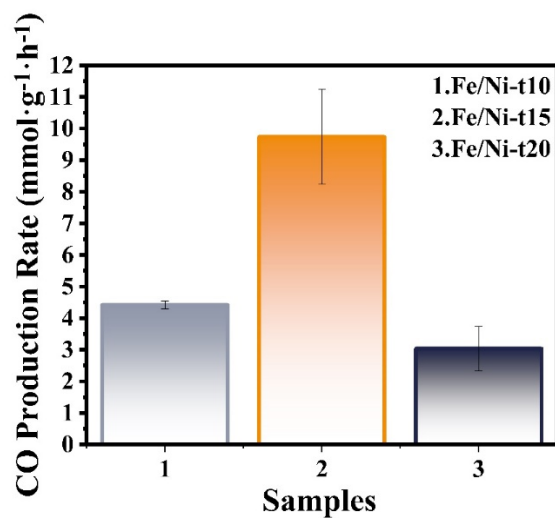

Figure 4s. CO production rate of Fe/Ni-t10、Fe/Ni-t15(Fe/Ni-T120) and Fe/Ni-t20.

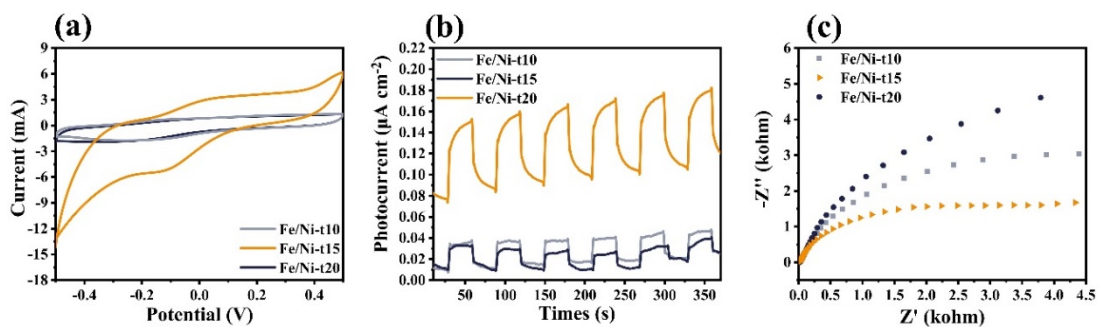

Figure 5s. (a) CV curves, (b) photocurrent response, (c) Nyquist plots of different photocatalyst samples of Fe/Ni-t10、Fe/Ni-t15(Fe/Ni-T120) and Fe/Ni-t20.
